# Supplementary material
Source: HighWire-hosted journal article supplement (https://bmjopen.bmj.com/content/9/8/e029044)
Supplement: inline-supplementary-material-1 [file inline-supplementary-material-1.pdf]

## Timeline

### Main trial

| Task                                                                                                 | Timeline          |
|------------------------------------------------------------------------------------------------------|-------------------|
| <b>Wave 1</b>                                                                                        |                   |
| Recruitment of schools                                                                               | Mar 18 – Sept 18  |
| Usual provision surveys (Time 1)                                                                     | Jun 18 – Oct 18   |
| Recruitment of pupils in relevant classes and year groups (via information sheets and consent forms) | Jul 18 – Oct 18   |
| Baseline measures (Time 1; pupil and teacher)                                                        | Sep 18 – Oct 18   |
| Randomisation                                                                                        | Oct 18            |
| Intervention delivery                                                                                | Jan 19 – Apr 19   |
| Case study visits (Time 1; observations and interviews)                                              | Mar 19 - Apr 19   |
| Implementation surveys                                                                               | April 19 – May 19 |
| Follow up measures (Time 2; teacher and pupil)                                                       | May 19 -Jun 19    |
| Finance survey                                                                                       | May 19 – Jul 19   |
| Follow up measures (Time 3; teacher)                                                                 | Jan 20 – Feb 20   |
| Follow up measures (Time 3; pupil)                                                                   | Jan 20 – Feb 20   |
| Usual provision surveys (Time 2)                                                                     | Nov 19            |
| Case study visits (Time 2; observations and interviews)                                              | Jan 20 – Feb 20   |
| <b>Wave 2</b>                                                                                        |                   |
| Recruitment of schools                                                                               | Feb 19 – Jun 19   |
| Usual provision surveys (Time 1)                                                                     | May 19 – Oct 19   |
| Recruitment of pupils in relevant classes and year groups (via information sheets and consent forms) | Jul 19 – Oct 19   |
| Baseline measures (Time 1; pupil and teacher)                                                        | Sep 19 – Oct 19   |
| Randomisation                                                                                        | Oct 19            |
| Intervention delivery                                                                                | Jan 20 – Mar 20   |
| Implementation surveys                                                                               | April 20 – May 20 |
| Follow up measures (Time 2; teacher and pupil)                                                       | May 20 -Jun 20    |
| Finance survey                                                                                       | May 20 – Jul 20   |
| Follow up measures (Time 3; teacher)                                                                 | Jan 21 – Mar 21   |
| Follow up measures (Time 3; pupil)                                                                   | Jan 21 – Mar 21   |
| Usual provision surveys (Time 2)                                                                     | Nov 20            |
| Data analysis cleaning and preparation for final analysis across Waves 1 and 2                       | Mar 21            |
| <b>Wave 3</b>                                                                                        |                   |
| Recruitment of schools                                                                               | Feb 22 – Sept 22  |
| Usual provision surveys (Time 1)                                                                     | May 22 – Oct 22   |
| Recruitment of pupils in relevant classes and year groups (via information sheets and consent forms) | Jul 22 – Oct 22   |
| Baseline measures (Time 1; pupil and teacher)                                                        | Sep 22 – Oct 22   |
| Randomisation                                                                                        | Oct 22            |
| Intervention delivery                                                                                | Jan 23 – Mar 23   |
| Implementation surveys                                                                               | April 23 – May 23 |
| Follow up measures (Time 2; teacher and pupil)                                                       | May 23 -Jun 23    |
| Finance survey                                                                                       | May 23 – Jul 23   |

|                                                                                   |                 |
|-----------------------------------------------------------------------------------|-----------------|
| Follow up measures (Time 3; teacher)                                              | Jan 24 – Mar 24 |
| Follow up measures (Time 3; pupil)                                                | Jan 24 – Feb 24 |
| Usual provision surveys (Time 2)                                                  | Nov 23          |
| Data analysis cleaning and preparation for final analysis across Waves 1, 2 and 3 | Mar 24          |
| Data analysis of Wave 1, Wave 2 and Wave 3 data                                   | Apr 24 – May 24 |
